# Supplementary material
Source: MDPI journal article supplement (https://www.mdpi.com/2073-4395/13/5/1235)
Supplement: s1 [file s1]

Article

# Influence of Fruit Wounding on Subsequent *Monilinia laxa* Infection of Nectarines

Maximiliano Dini <sup>1,2,\*</sup>, Maria do Carmo Bassols Raseira<sup>3</sup>, Marie-Noëlle Corre<sup>4</sup>, Véronique Signoret<sup>4</sup>, Bénédicte Quilot-Turion<sup>4</sup>

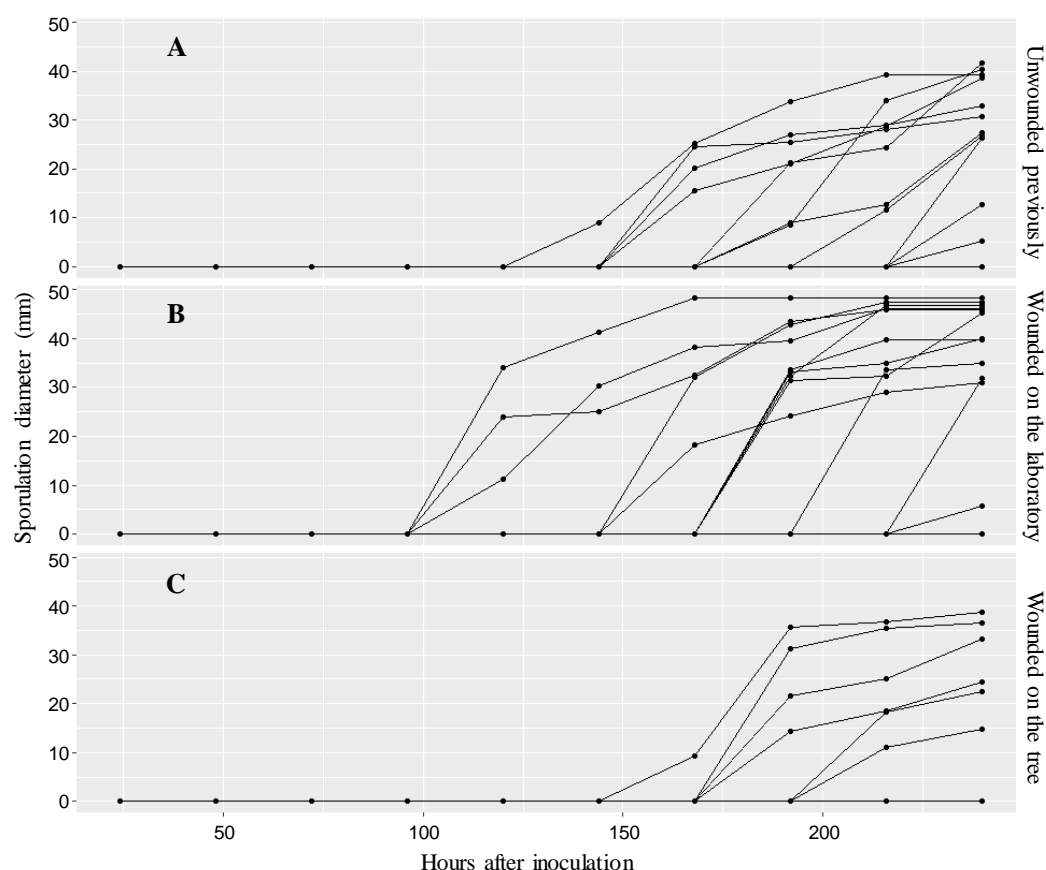

**Supplementary Figure S1.** Brown rot lesion growth in Zephyr immature fruits wounded and immediately inoculated with *Monilinia laxa*, in three conditions (first experiment): unwounded previously (A); previously wounded on the laboratory in one side of the fruit (B); previously wounded on the tree in one side of the fruit (C).

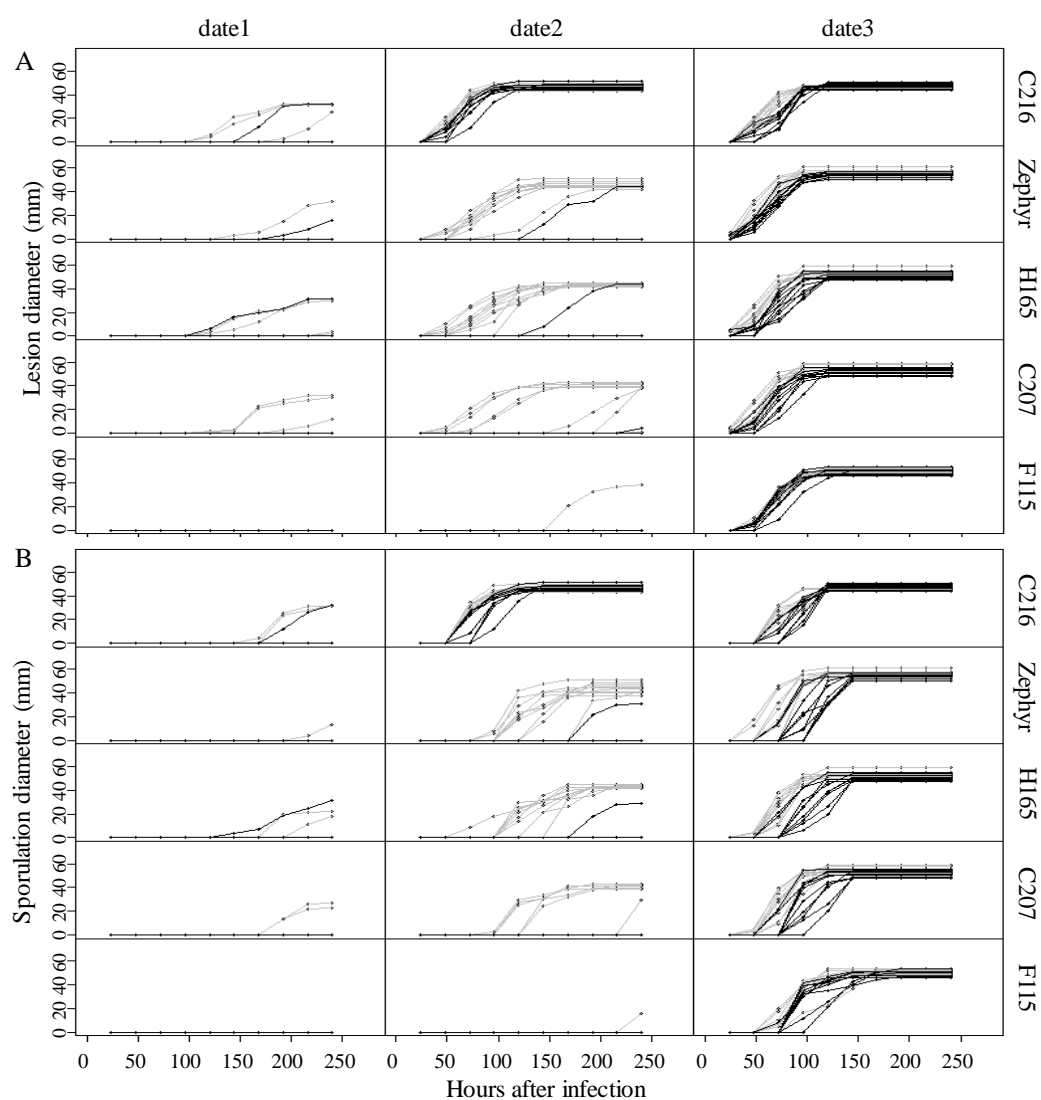

**Figure S2.** Lesion (A) and sporulation (B) diameter in five nectarine genotypes inoculated with *M. laxa* immediately after wounding (gray line) and inoculated 7 hours after wounding (black line), in three stages of fruit development (fourth experiment). date1 = May 28, 11 to 15 weeks after full bloom (WAFB); date2 = June 20, 15 to 19 WAFB; date3 = corresponds to the ripening date of each genotype (20 to 26 WAFB).

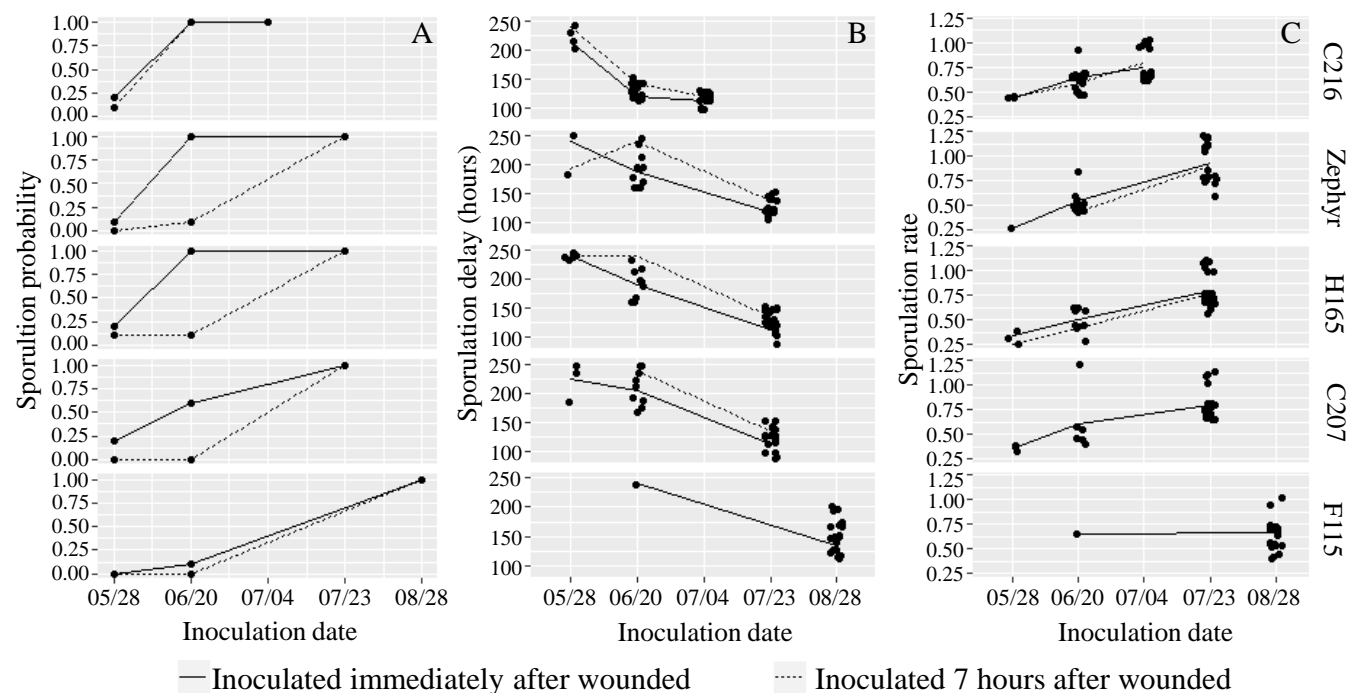

**Figure S3.** *Monilinia laxa* sporulation probability (A), sporulation delay (B) and sporulation rate (C) in five nectarine genotypes inoculated immediately after wounding (IAW) and inoculated seven hours after wounding (I7hAW), in three stages of fruit development (fourth experiment). First date (May 28), 11 to 15 weeks after full bloom (WAFB); second date (June 20), 15 to 19 WAFB; and third, the ripening date of each genotype (20 to 26 WAFB).

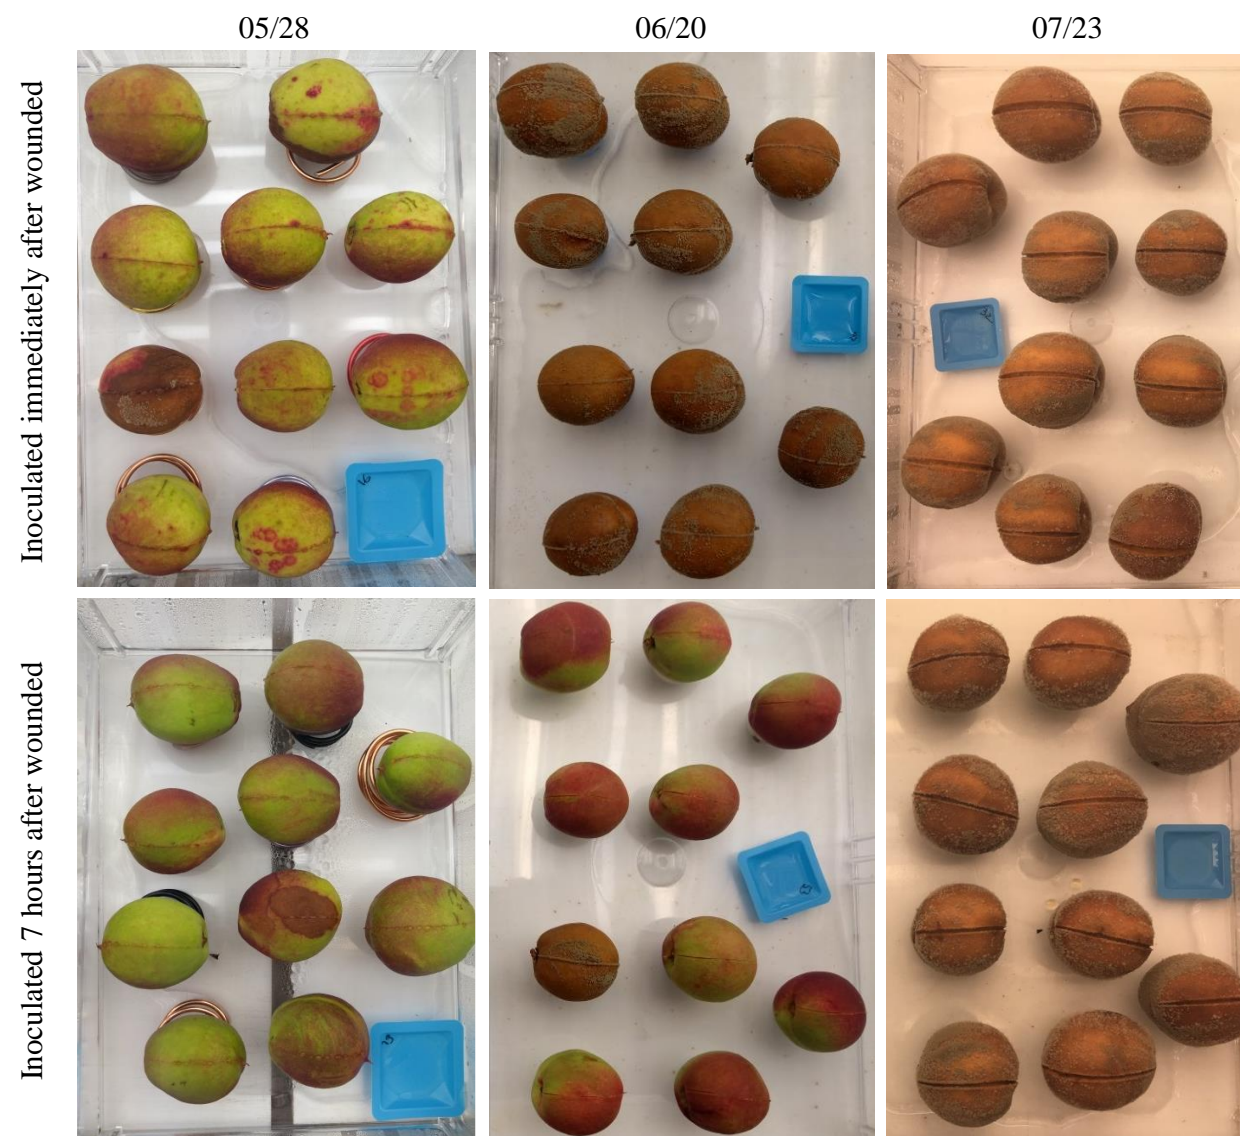

**Figure S4.** Fruit from Zephyr infected by *M. laxa*, inoculated immediately after wounding (IAW) or 7 hours after wounding (I7hAW), at three fruit development stages (fourth experiment): date1 = May 28, 15 weeks after full bloom (WAFB); date2 = June 20 (19 WAFB); date3 = July 23, ripening stage (21 WAFB). Photos were taken 240 hours after inoculation.

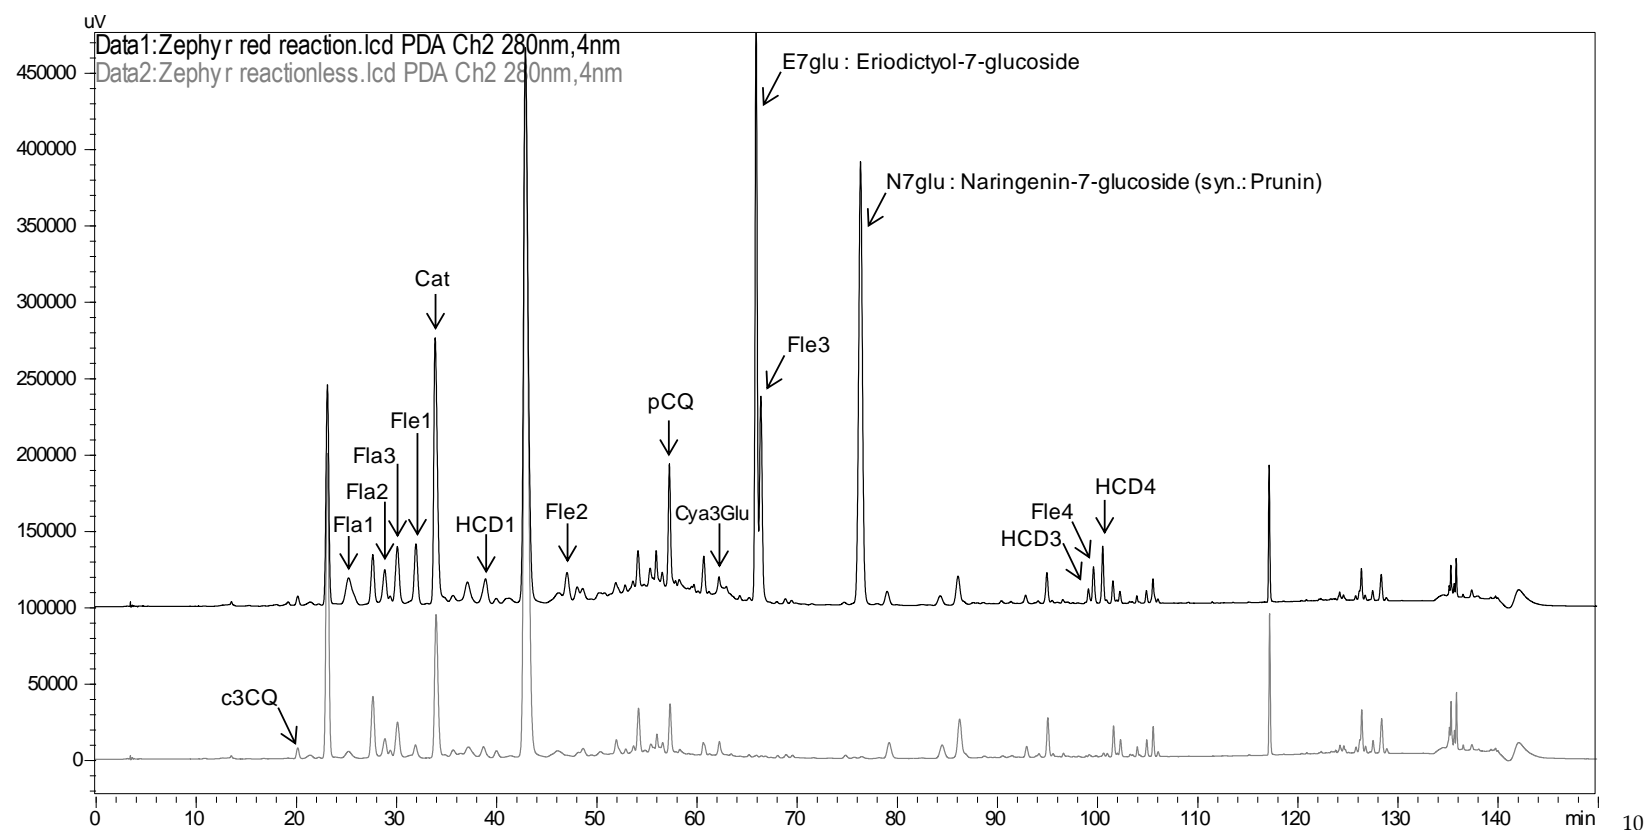

**Figure S5.** HPLC chromatogram (280 nm) of immature Zephyr on fruit (15 weeks after full bloom) with red reaction (wounded + *Monilinia laxa* immediate inoculation) and no red reaction (wounded + *M. laxa* inoculation seven hours after wounding). Marked peaks correspond to compounds that differed significantly between the two samples. Abbreviations: Fla, Flavan-3-ol; Cat, Catechin; Fle, Flavanone; HCD, Hydroxycinnamic derivative; pCQ, 5-p-Coumaroylquinic acid; c3CQ, cis-Neochlorogenic acid.

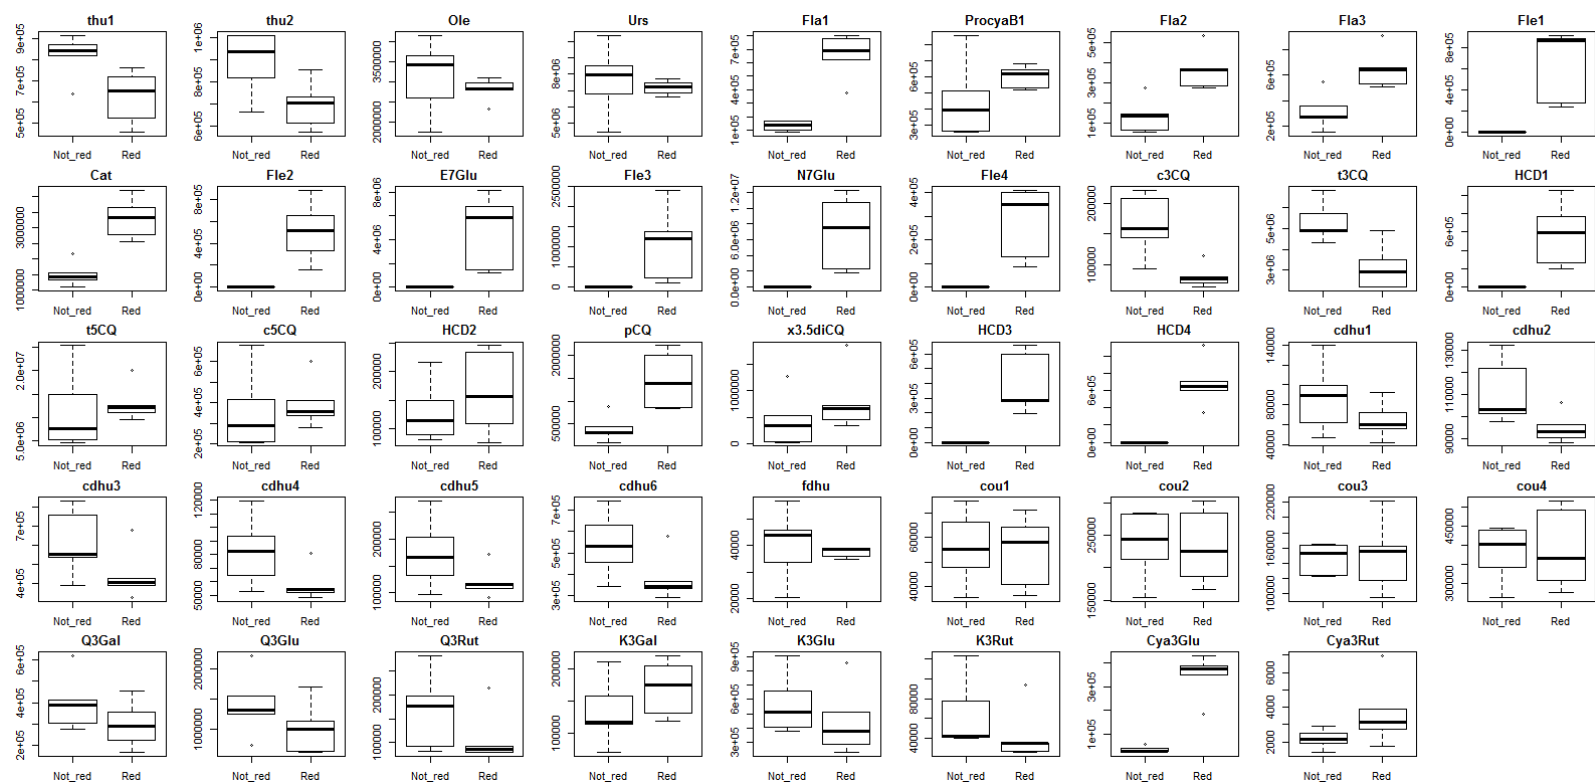

**Figure S6.** Boxplot of the HPLC peaks area of compounds identified on samples from red reaction (Red) zones and not red (Not\_red) zones, in immature fruits (11 to 15 weeks after full bloom), 2018 season. Abbreviations of compounds in Table 2.

15  
 16  
 17  
 18
